# Supplementary material for: Seomae mugwort and jaceosidin attenuate osteoarthritic cartilage damage by blocking IκB degradation in mice
Source: PubMed Central journal article supplement (PMC7348148; doi:10.1111/jcmm.15471), 2020-06-11
Supplement: JCMM-24-8126-s001.pdf [file JCMM-24-8126-s001.pdf]

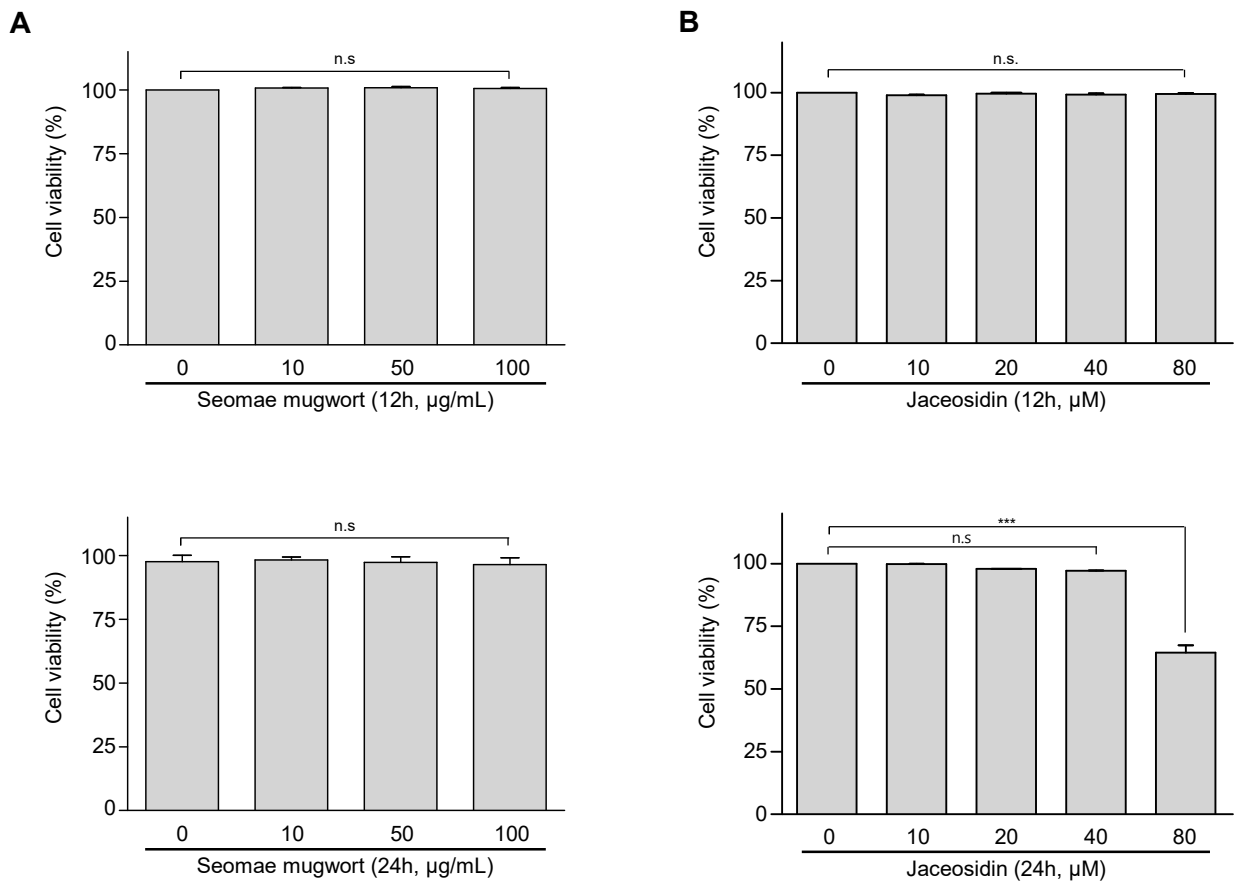

**Figure S1.** Seomae mugwort extract and jaceosidin did not affect cell viability in mouse articular chondrocytes. **(A)** The Seomae mugwort extract was used to treat articular chondrocytes at concentrations of 0, 10, 50, and 100 µg/mL for 12 h and 24 h and analyzed using the LDH assay. **(B)** Articular chondrocytes were treated with jaceosidin at concentrations of 0, 10, 20, 40, and 80 µM for 12 h and 24 h and analyzed using the LDH assay. Values are the mean  $\pm$  SEM as analysis by one-way ANOVA with Bonferroni's test ( $n = 4$ ). Significant differences from the pro-inflammatory cytokine-treated group value: \*\* $P < 0.01$ , \*\*\* $P < 0.001$ , # $P < 0.05$  compared to the control group.

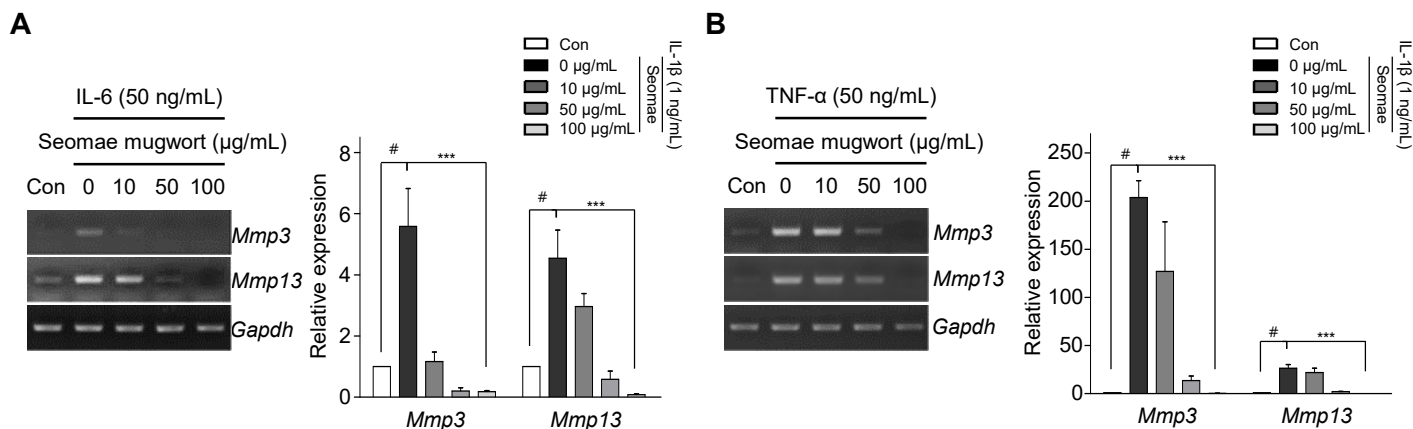

**Figure S2.** Seomae mugwort extract suppressed the pro-inflammatory cytokine-induced MMP3 and MMP13 expression in chondrocytes. (**A**, **B**) Chondrocytes were treated with IL-6 (50 ng/mL) (**A**) and TNF- $\alpha$  (50 ng/mL) (**B**) and co-treated with different concentrations of the Seomae mugwort extract for 24 h. MMP3 and MMP13 expression levels were evaluated by PCR (**A**, **B**; left) and qRT-PCR (**A**, **B**; right). Values are the mean  $\pm$  SEM as analyzed by one-way ANOVA with Bonferroni's test. Significant differences from the pro-inflammatory cytokine-treated group value: \*\*P < 0.01, \*\*\*P < 0.001, #P < 0.05 compared to the control group. Seomae, Seomae mugwort.

**A**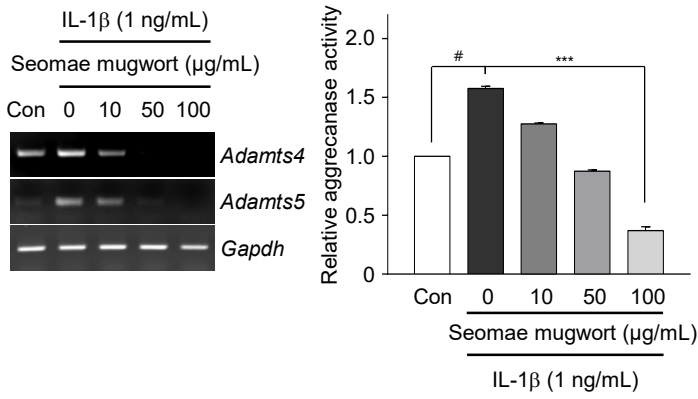**B**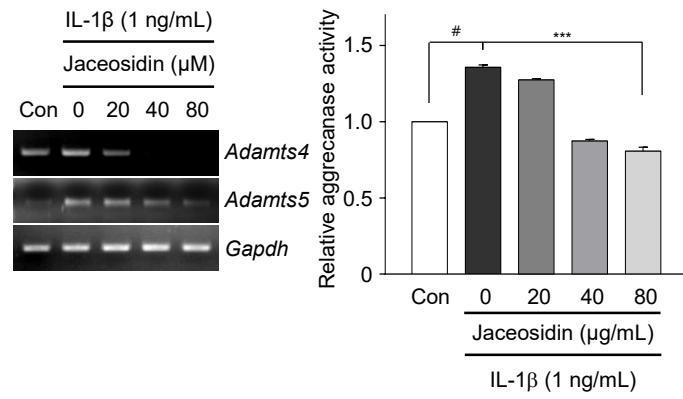**C**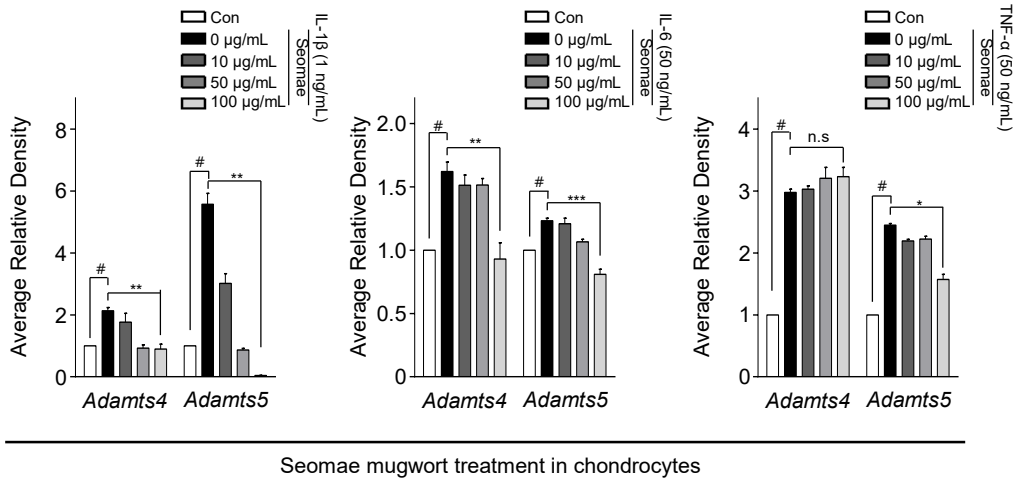**D**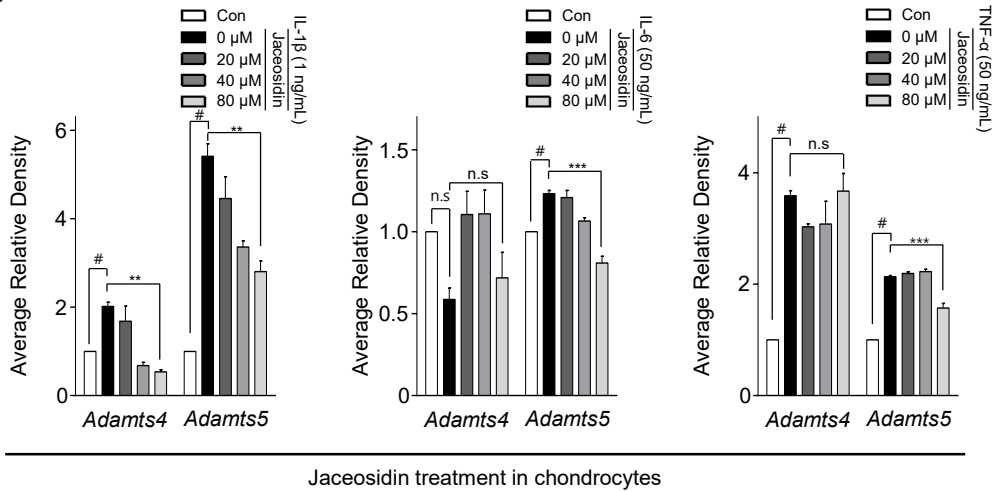

**Figure S3.** Seomae mugwort extract and jaceosidin suppressed the IL-1 $\beta$ -, IL-6-, and TNF- $\alpha$ -induced ADAMTS4 and ADAMTS5 expression in chondrocytes. Chondrocytes were treated with IL-1 $\beta$  (1 ng/mL) and co-treated with different concentrations of the Seomae mugwort extract for 24 h (**A**) and jaceosidin for 12 h (**B**). ADAMTS4 and ADAMTS5 expression levels were evaluated by PCR (**A, B**; left) and aggrecanase assay (**A, B**; right) analyses. (**C, D**) Chondrocytes were treated with IL-1 $\beta$  (1 ng/mL), IL-6 (50 ng/mL), and TNF- $\alpha$  (50 ng/mL), respectively, and co-treated with Seomae mugwort extract and jaceosidin. ADAMTS4 and ADAMTS5 were detected by qRT-PCR in Seomae mugwort (**C**) and jaceosidin (**D**) treatment. Values are the mean  $\pm$  SEM as analyzed by one-way ANOVA with Bonferroni's test (n = 4). Significant differences from the pro-inflammatory cytokine-treated group value: \*\*P < 0.01, \*\*\*P < 0.001, #P < 0.05 compared to the control group. Seomae, Seomae mugwort.

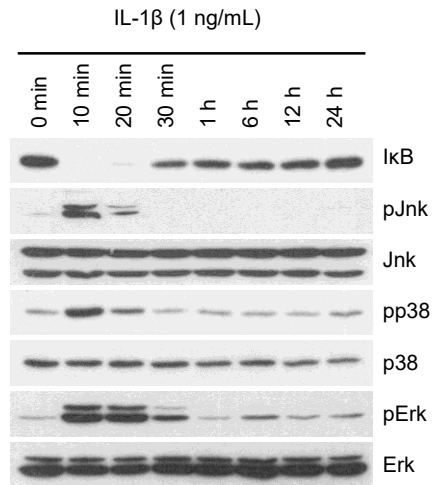

**Figure S4.** IL-1 $\beta$  induced NF- $\kappa$ B and MAPK signaling in mouse chondrocytes. Chondrocytes were treated with IL-1 $\beta$  (1 ng/mL) for different durations of time from 10 min to 24 h. The activation of each signaling pathway is shown by western blot.
